# Supplementary material
Source: HighWire-hosted journal article supplement (https://jnm.snmjournals.org/highwire/filestream/95408/field_highwire_adjunct_files/0/216697_Supplemental_Data.pdf)
Supplement: 216697_Supplemental_Data.pdf [file 216697_Supplemental_Data.pdf]

**Supplemental Table 1.** Studies showing the relationship between tumour, bone marrow and nodal glucose metabolism and host systemic inflammatory responses in patients with cancer

| Author            | Date | Country | (n) | Type of Cancer       | Tracer | Measurements                                                                             | Readings                                                                         | Correlation                                                                                                                                                                                                                                                                                                                                                                        | Survival                                                                                                                                                                                                                                                              |
|-------------------|------|---------|-----|----------------------|--------|------------------------------------------------------------------------------------------|----------------------------------------------------------------------------------|------------------------------------------------------------------------------------------------------------------------------------------------------------------------------------------------------------------------------------------------------------------------------------------------------------------------------------------------------------------------------------|-----------------------------------------------------------------------------------------------------------------------------------------------------------------------------------------------------------------------------------------------------------------------|
| Prevost et al(21) | 2006 | Canada  | 120 | Lung                 | 18-FDG | TSUVmean<br>TSUVmax<br>BMSUVmax<br>BLR<br>WCC, Hb, Platelets                             | TSUVmean: 6.2 (1.4-23)<br>BMSUVmax:1.5 (0.6-3.2)<br>BLR: 1 (0.6-2.4)             | Spearman correlation<br>TSUVmax<br>BMSUVmax: (r=0.20 p<0.05)<br>BLR: NS<br>WCC (NS)<br>Hb (NS)<br>Platelets (NS)<br><br>BMSUVmax<br>BLR: (r=0.76 p<0.05)<br>TSUVmax: (r=0.20 p<0.05)<br>WCC (r=0.38 p<0.05)<br>Hb (r=-0.30 p<0.05)<br>Platelets (r=0.24 p<0.05)<br><br>BLR<br>BMSUVmax: 0.76 p<0.05)<br>TSUVmax: NS<br>WCC (r=0.49 p<0.05)<br>Hb (NS)<br>Platelets (r=0.30 p<0.05) | Kaplan-Meier<br>OS: Median survival (95%CI)<br>TSUVmax (weight adjusted)≥10: 227 (122-690) p=0.003<br>BMSUVmax≥1.7: 151 (83-690) p=0.00006<br>BLR<1.5: 724 (553-1,094) p=0.00004<br><br>Multivariate Cox Regression<br>OS:<br>BMSUVmax: RR: 1.6 95%CI 1.1-2.3 p=0.008 |
| Cicone et al(22)  | 2008 | Belgium | 35  | SCC of head and neck | 18-FDG | TSUVmax<br>TSUVmean<br>BMSUVmax,<br>BMSUVmean,<br>Tumour size, Hb,<br>WCC, Platelet, RBC | TSUVmax: 10.4 (3.2-29.9)<br>TSUVmean: 7.8 (2.6-24.6)<br>BMSUVmean: 1.4 (0.7-2.4) | Pearson's Correlation<br>TSUVmax:<br>No correlation with any blood parameters<br><br>TSUVmean:<br>WCC (r=0.44; p=0.011)<br><br>BMSUVmean:<br>No correlation with any blood parameters                                                                                                                                                                                              | CSS:<br>Multivariate Cox Regression<br>BMSUVmean: p=0.04 (No HR or CI given)<br><br>OS:<br>Multivariate Cox Regression<br>BMSUVmean: p=0.03 (No HR or CI given)                                                                                                       |
| Inoue et al(20)   | 2009 | Japan   | 32  | Multiple             | 18-FDG | BMSUVmean,<br>LiverSUVmean,<br>BLR, WCC, RBC,<br>Platelet, CRP                           | BMSUV mean: 1.4±0.3<br>Liver SUV mean: 1.8±0.3<br>BLR: 0.75±0.16                 | Pearson's Correlation<br>BMSUVmean:<br>WCC: (r=0.28 p=NS)<br>RBC (r=0.42. p<0.05)<br>Platelet (r=-0.06 p=NS)<br>CRP (r=0.25 p=NS)<br><br>BLR:<br>WBC (r=0.35 p<0.05)<br>RBC (r=0.12 p=NS)<br>Platelet (r=0.06 p=NS)                                                                                                                                                                | Not carried out for PET-CT markers                                                                                                                                                                                                                                    |

|                 |      |             |      |                                     |         |                                                            |                                                                                   |                                                                                                                                                                                                                                                     |                                                                                                                                                                                                                                                                                                                                                       |
|-----------------|------|-------------|------|-------------------------------------|---------|------------------------------------------------------------|-----------------------------------------------------------------------------------|-----------------------------------------------------------------------------------------------------------------------------------------------------------------------------------------------------------------------------------------------------|-------------------------------------------------------------------------------------------------------------------------------------------------------------------------------------------------------------------------------------------------------------------------------------------------------------------------------------------------------|
|                 |      |             |      |                                     |         |                                                            |                                                                                   | CRP (r=0.50 p<0.005)                                                                                                                                                                                                                                |                                                                                                                                                                                                                                                                                                                                                       |
| Chang et al(23) | 2013 | Taiwan      | 151  | Oral cavity squamous cell carcinoma | 18-FDG  | SUVmax, CRP                                                | TSUVmax≥19.3                                                                      | Spearman Correlation<br>TSUVmax:<br>CRP (r=Not given p<0.001)                                                                                                                                                                                       | Not carried out for PET-CT markers                                                                                                                                                                                                                                                                                                                    |
| Chen et al.(24) | 2013 | China       | 106  | Pharyngo-laryngeal                  | 18-FDG  | TSUVmax, NSUVmax, CRP                                      | TSUVmax≥8.6mg/L<br>NSUVmax≥5.7ng/ml                                               | Chi-squared test<br>TSUVmax<br>CRP (p=0.472)<br><br>NSUVmax<br>CRP (p=0.014)                                                                                                                                                                        | Not carried out for PET-CT markers                                                                                                                                                                                                                                                                                                                    |
| Jeong et al(25) | 2016 | South Korea | 1034 | Lung                                | 18- FDG | TSUVmax<br>WBC, Neutrophil, Lymphocyte, NLE                | TSUV max>7.83                                                                     | Linear Correlation:<br>TSUVmax:<br>WCC (r=0.208 p<0.001)<br>Neutrophil (r=0.175 p<0.001)<br>Lymphocyte (r=0.101 p=0.001)<br>NLR (r=0.004 p=0.004)                                                                                                   | Multivariate Cox Regression:<br>OS:<br>TSUVmax>7.83: HR: 2.222<br>95%CI 1.518-3.254 p<0.001                                                                                                                                                                                                                                                           |
| Zhong et al(26) | 2017 | China       | 121  | Naso-pharyngeal carcinoma           | 18- FDG | TSUVmax, NSUVmax, Neutrophils, Monocytes, Leukocytes       | TSUVmax: >12.35<br>NSUVmax >10.15                                                 | Spearman's Correlation<br>TSUVmax:<br>Leukocytes (r=0.203 p=0.025),<br>neutrophils (r=0.238 p=0.009)<br>monocytes (r=0.185 p=0.043)<br><br>NSUVmax:<br>Leukocytes (r=0.068 p=0.46),<br>neutrophils (r=0.023 p=0.802)<br>monocytes (p=0.024 p=0.024) | Kaplan Mier<br>PFS:<br>TSUVmax>12.35: p=0.204<br>NSUVmax>10.15 p=0.004<br><br>DMFS:<br>TSUVmax>12.35: Not conducted<br>NSUVmax>10.15 p=0.003<br><br>Multivariate Cox Regression:<br>PFS:<br>NSUVmax>10.15: HR:2.572<br>95%CI 1.121-5.898 p=0.026<br><br>Multivariate Cox Regression:<br>DMFS:<br>NSUVmax>10.15: HR:3.065<br>95%CI 1.145-8.201 p=0.026 |
| Lee et al(27)   | 2017 | South Korea | 110  | Lung                                | 18- FDG | TSUVmax, MBSUVmax<br>BLR<br>Albumin, CRP NLR, PLR, WCC, Hb | TSUVmax: 7.65 (0.80-19.00)<br>MBSUVmax: 1.47 (0.94-2.63)<br>BLR: 0.72 (0.46-1.40) | Spearman Correlation<br>BMSUVmax:<br>Albumin (r=-0.062 p=0.50)<br>CRP (r=0.279 p=0.003)<br>NLR (r=0.236 p=0.01)<br>PLR (r=0.137 p=0.20)                                                                                                             | Multivariate Cox Regression:<br>PFS:<br>TSUVmax>6.5: HR:3.169<br>95%CI 1.43-6.99 p=0.005<br>BLR>0.8: HR: 2.49 95%CI 1.25-4.94 p=0.01                                                                                                                                                                                                                  |

|                |      |             |     |         |         |                                                                                              |                                                                                                                                                         |                                                                                                                                                                                                                                                                                                                                                                                      |                                                                                                                                                                                                                                                                                                                                                                                                                                                                                                                                                                                                                                     |
|----------------|------|-------------|-----|---------|---------|----------------------------------------------------------------------------------------------|---------------------------------------------------------------------------------------------------------------------------------------------------------|--------------------------------------------------------------------------------------------------------------------------------------------------------------------------------------------------------------------------------------------------------------------------------------------------------------------------------------------------------------------------------------|-------------------------------------------------------------------------------------------------------------------------------------------------------------------------------------------------------------------------------------------------------------------------------------------------------------------------------------------------------------------------------------------------------------------------------------------------------------------------------------------------------------------------------------------------------------------------------------------------------------------------------------|
|                |      |             |     |         |         |                                                                                              |                                                                                                                                                         | <p>WCC (r=-0.210 p=0.03)<br/>Hb (r=-0.038 p=0.70)</p> <p>BLR:<br/>Albumin (r=-0.227 p=0.02)<br/>CRP (r=0.437 p=0.001)<br/>NLR (r=0.305 p=0.001)<br/>PLR (r=0.318 p&lt;0.01)<br/>WCC (r=0.278 p=0.03)<br/>Hb (r=-0.069 p=0.50)</p>                                                                                                                                                    | <p>OS:<br/>TSUVmax&gt;6.5: HR:4.49<br/>95%CI 1.05-19.92 p=0.04<br/>BLR&gt;0.8: HR: 2.15 95%CI<br/>0.69-7.87 p=0.20</p>                                                                                                                                                                                                                                                                                                                                                                                                                                                                                                              |
| Lee et al(28)  | 2017 | South Korea | 106 | Lung    | 18- FDG | <p>TSUVmax,<br/>MTV<br/>TLG<br/>BMSUVmax<br/>BLR<br/>WCC, Hb, NLR,<br/>PLR, Albumin, CRP</p> | <p>TSUVmax: 10.48 (1.40-32.19)<br/>MTV: 20.97 (1.10-650.75)<br/>TLG: 138.47 (2.80-3715.78)<br/>MBSUVmax: 1.57 (0.94-2.22)<br/>BLR: 0.79 (0.45-1.50)</p> | <p>Spearman Correlation<br/>BMSUVmax:<br/>WCC (r=0.294 p=0.002)<br/>Hb (r=-0.015 p=0.8)<br/>NLR (r=0.034 p=0.7)<br/>PLR (r=0.070 p=0.4)<br/>Albumin (r=-0.190 p=0.05)<br/>CRP (r=0.296 p=0.002)</p> <p>BLR:<br/>WCC (r=0.396 p&lt;0.001)<br/>Hb (r=-0.114 p=0.2)<br/>NLR (r=0.281 p=0.06)<br/>PLR (r=0.070 p=0.5)<br/>Albumin (r=-0.349 p&lt;0.001)<br/>CRP (r=0.428 p&lt;0.001)</p> | <p>Univariate Cox Regression:<br/>PFS:<br/>MTV: 1.00 (1.00-1.01) p=0.40<br/>TLG: 1.00 (0.99-1.01) p=0.50</p> <p>Multivariate Cox Regression<br/>PFS:<br/>TSUVmax: HR:0.99 95%CI<br/>0.92-1.04 p=0.5<br/>BMSUVmax: HR:0.73 95%CI<br/>0.18-3.05 p=0.73<br/>BLR: HR: 14.44 95%CI 2.60-<br/>80.28 p=0.002</p> <p>Univariate Cox Regression<br/>OS:<br/>BMSUVmax: HR: 2.01 95%CI<br/>0.53-7.65 p=0.30</p> <p>Multivariate Cox Regression<br/>OS:<br/>TSUVmax: HR:1.00 95%CI<br/>0.99-1.01 p=0.9<br/>MTV: HR: 1.00 95%CI 0.99-<br/>1.02 p=0.7<br/>TLG: HR: 1.08 (0.94-1.22)<br/>p=0.07<br/>BLR: HR: 1.24 95%CI 0.60-<br/>24.61 p=0.90</p> |
| Lee et al (29) | 2017 | South Korea | 309 | Gastric | 18- FDG | <p>BMSUVmax<br/>BLR<br/>CRP, Albumin, Hb,<br/>NLR, PLR</p>                                   | <p>TSUVmax: 4.71 (2.62-37.80)<br/>BMSUVmax: 1.45 (0.55-2.66)<br/>BLR: 0.70 (0.28-1.35)</p>                                                              | <p>Spearman correlation<br/>BMSUVmax<br/>TSUVmax : (r=0.093 p=0.104)<br/>WCC: (r=0.039 p=0.600)<br/>Hb (r=-0.117 p=0.039)<br/>NLR (r=0.121 p=0.033)<br/>PLR (r=0.158 p=0.005)<br/>Albumin (r=-0.041 p=0.474)<br/>CRP (r=0.100 p=0.079)</p>                                                                                                                                           | <p>Multivariate Cox Regression<br/>RFS:<br/>TSUVmax: HR: 1.33 95%CI<br/>0.70-2.39 p=0.215<br/>BMSUVmax: HR: 0.94 95%CI<br/>0.38-2.33 p=0.945<br/>BLR : HR : 6.42 95%CI 2.07-<br/>19.84 p=0.001</p>                                                                                                                                                                                                                                                                                                                                                                                                                                  |

|                    |      |                |     |            |         |                                                               |                                                                                |                                                                                                                                                                                                                                                                                                                                                                                                                                                                        |                                                                                                                                                                                                                                                                                                                                |
|--------------------|------|----------------|-----|------------|---------|---------------------------------------------------------------|--------------------------------------------------------------------------------|------------------------------------------------------------------------------------------------------------------------------------------------------------------------------------------------------------------------------------------------------------------------------------------------------------------------------------------------------------------------------------------------------------------------------------------------------------------------|--------------------------------------------------------------------------------------------------------------------------------------------------------------------------------------------------------------------------------------------------------------------------------------------------------------------------------|
|                    |      |                |     |            |         |                                                               |                                                                                | BLR<br>TSUVmax : (r=0.212 p=0.002)<br>WCC : (r=0.003 p=0.563)<br>Hb : (r=-0.172 p=0.002)<br>NLR: (r=0.224 p=0.001)<br>PLR : (r=0.250 p<0.001)<br>Albumin (r=-0.168 p=0.003)<br>CRP (r=0.094 p=0.100)                                                                                                                                                                                                                                                                   | OS :<br>TSUVmax : HR : 2.89 95%CI<br>0.96-8.72 p=0.059<br>BLR: HR: 10.39 95%CI 1.34-<br>80.33 p=0.025                                                                                                                                                                                                                          |
| McSorley et al(30) | 2017 | United Kingdom | 103 | Colorectal | 18- FDG | TSUVmax<br>TSUVpeak<br>MTV<br>TLG<br>mGPS, NLR                | TSUVmax: 11 (0-35)<br>TSUVpeak: 8 (0-29)<br>MTV: 4 (0-311)<br>TLG: 28 (0-3124) | Categorical data: Chi squared test<br>Continuous data: Mann-Whitney U test<br>Pre-Op Scans (n=33): No association<br>between TSUVmax, TSUVpeak,<br>MTV, TLG, mGPS and NLR<br><br>Post-Op Scans (n=70)<br>NLR≥5:<br>TSUVmax (20 vs 7 p=0.002)<br>SUVpeak (14 vs 4 p<0.001)<br>MTV (29mL vs 2mL p=0.001)<br>TLG (338g vs 9g p<0.001)<br><br>mGPS 1/2:<br>TSUVmax (11 vs 6 p=0.048)<br>SUVpeak (8 vs 4 p=0.046)<br>MTV (13mL vs 2mL p=0.005)<br>TLG (146g vs 10g p=0.004) | Univariate Cox Regression<br>Post op cohort (n=70)<br>CSS:<br>TSUVmax: HR: 2.02 95%CI<br>0.82-4.98 p=0.128<br>MTV : HR : 1.68 95%CI 0.66-<br>4.22 p=0.275<br><br>Multivariate Cox Regression<br>Post op cohortes (n=70)<br>CSS:<br>TSUVpeak: HR: 2.39 95%CI<br>0.95-5.99 p=0.064<br>TLG : HR :2.51 95%CI 1.00-<br>6.28 p=0.720 |
| Lee et al(31)      | 2017 | South Korea    | 226 | Colorectal | 18-FDG  | TSUVmax<br>Tumour size<br>BMSUVmean,<br>WCC, CRP, NLR,<br>PLR | TSUVmax: 10.85 (2.54-48.80)<br>BMSUVmean: 1.67 (0.63-3.12)                     | Spearman correlation:<br>BMSUVmean:<br>TSUVmax: (r=0.266 p<0.001)<br>Tumour size: (r=0.159 p<0.017)<br>WCC (r=0.160 p=0.016)<br>CRP (r=0.252 p<0.001)<br>NLR (r=0.223 p<0.001)<br>PLR (r=-0.109 p=0.131)                                                                                                                                                                                                                                                               | Univariate Cox Regression<br>RFS :<br>TSUVmax>10.50 : HR :<br>0.59 95%CI 0.29-1.20 p=0.145<br>BMSUVmean>1.90 :<br>HR : 2.94 95%CI 1.30-6.63<br>p=0.009                                                                                                                                                                         |

Footnote: C-reactive protein (CRP), WCC (White Cell Count), RBC (Red Blood Cell Count), mGPS (modified Glasgow Prognostic Score), NLR (Neutrophil to Platelet Ratio), PLR (Platelet to Lymphocyte Ratio), Hb (Haemoglobin), HR (Hazard Ratio), 95%CI (95%Confidence Interval), TSUVmax (Tumour SUVmax), BMSUVmax (Bone Marrow SUVmax), TSUVmean (Tumour SUVmean), BMSUVmean (Bone Marrow SUVmean), BLR (Bone marrow to Liver SUVmean Ratio), TLG (Total Lesion Glycolysis), MTV (Metabolic Tumour Volume)
